# Supplementary material for: The Effect of Maternal Overweight and Obesity Pre-Pregnancy and During Childhood in the Development of Obesity in Children and Adolescents: A Systematic Literature Review
Source: MDPI journal article supplement (doi:10.3390/nu14235125), 2022-12-02
Supplement: s1 [file s1]

## Supplementary Materials

**Table S1.** The Quality Criteria Checklist for Primary Research.

| RELEVANCE QUESTION* |                                                                                                                                                                                 |
|---------------------|---------------------------------------------------------------------------------------------------------------------------------------------------------------------------------|
| 1                   | Would implementing the studied intervention or procedure (if found successful) result in improved outcomes for the patients/clients/population group? (NA for some Epi studies) |
| 2                   | Did the authors study an outcome (dependent variable) or topic that the patients/clients/population group would care about?                                                     |
| 3                   | Is the focus of the intervention or procedure (independent variable) or topic of study a common issue of concern to dietetics practice?                                         |
| 4                   | Is the intervention or procedure feasible? (NA for some epidemiological studies)                                                                                                |
| VALIDITY QUESTION*  |                                                                                                                                                                                 |
| 1                   | Was the research question clearly stated?                                                                                                                                       |
| 2                   | Was the selection of study subjects/patients free from bias?                                                                                                                    |
| 3                   | Were study groups comparable?                                                                                                                                                   |
| 4                   | Was method of handling withdrawals described?                                                                                                                                   |
| 5                   | Was blinding used to prevent introduction of bias?                                                                                                                              |
| 6                   | Were intervention/therapeutic regimens/exposure factor or procedure and any comparison(s) described in detail? Were intervening factors described?                              |
| 7                   | Were outcomes clearly defined and the measurements valid and reliable?                                                                                                          |
| 8                   | Was the statistical analysis appropriate for the study design and type of outcome indicators?                                                                                   |
| 9                   | Are conclusions supported by results with biases and limitations taken into consideration?                                                                                      |
| 10                  | Is bias due to study's funding or sponsorship unlikely?                                                                                                                         |

\*Adapted from the Quality Criteria Checklist for Primary Research [36].

**Table S2.** PubMed Search Strategy.

|              | Search # | Search Statement                                                                                                                                                                  | Term Type     |
|--------------|----------|-----------------------------------------------------------------------------------------------------------------------------------------------------------------------------------|---------------|
| Population   | 1        | pediatrics OR child OR adolescent OR offspring                                                                                                                                    | MeSH Headings |
|              | 2        | maternal obesity OR mothers OR prenatal development OR parent OR Prenatal Exposure Delayed Effects OR "Embryonic and Fetal Development"                                           | MeSH Headings |
|              | 3        | "Maternal weight status" OR "Maternal overweight" OR Postpartum OR Postnatal OR Prepregnancy OR Preconception OR Pregravid OR "parent* obes*" OR "During Childhood" OR obesogenic | Keywords      |
| Exposure     |          | 2 OR 3                                                                                                                                                                            | -             |
|              | 4        | obesity OR overweight OR body composition OR body mass index OR body weight OR waist circumference OR Body-Weight Trajectory OR body mass index                                   | MeSH Headings |
|              | 5        | "Body-weight trajectory" OR BMI                                                                                                                                                   | Keywords      |
|              | 6        | 4 OR 5                                                                                                                                                                            | -             |
| Outcome      | 7        | childhood obesity OR adolescent obesity                                                                                                                                           | MeSH Headings |
|              | 8        | "Weight for height" OR "BMI for age"                                                                                                                                              | Keywords      |
|              | 9        | 8 OR 9                                                                                                                                                                            | -             |
| Study Design | 10       | cohort studies OR retrospective studies OR prospective studies OR observational studies                                                                                           | MeSH Headings |
|              |          | 3 AND 4 AND 7 AND 10 AND 13                                                                                                                                                       |               |
|              | 11       | Limits: (From 2012/1/1 to 2022/4/14, Humans, English, Preschool Child: 2-5 years, Child: 6-12 years, Adolescent: 13-18 years)                                                     | -             |

\*Truncation (to expand spellings and multiple endings of a word); PubMed/MEDLINE database coverage: 1965 to present. Last searched 13 April 2022.

**Table S3.** CINAHL/EBSCO search strategy.

|              | Search # | Search Statement                                                                                                                                                                                                             | Limits        |
|--------------|----------|------------------------------------------------------------------------------------------------------------------------------------------------------------------------------------------------------------------------------|---------------|
| Population   | 1        | Pediatrics+ OR Child+ OR Adolescence+                                                                                                                                                                                        | MeSH Headings |
|              | 2        | obesity, maternal+ OR mothers+ OR maternal exposure+ OR fetal development+ OR parents+ OR prenatal exposure delayed effects+ OR postnatal period+ "pre*gravid" OR maternal overweight OR "pre-conception" OR "pre-pregnancy" | All fields    |
|              | 3        | OR "during childhood" OR "Maternal weight status" OR "parent* obes*" OR Obesogenic                                                                                                                                           | All fields    |
| Exposure     | 4        | Obesity+ OR Body Composition+ OR Body Mass Index OR Waist Circumference OR Body Mass Index                                                                                                                                   | MeSH Headings |
|              | 5        | "overweight" OR "body-weight trajectory" OR BMI                                                                                                                                                                              | All fields    |
|              | 6        | 2 OR 3 OR 4 OR 5                                                                                                                                                                                                             | -             |
|              | 7        | Pediatric Obesity                                                                                                                                                                                                            | MeSH Headings |
| Outcome      | 8        | adolescent obesity OR childhood obesity OR BMI for age OR weight for height                                                                                                                                                  | All fields    |
|              | 9        | 7 OR 8                                                                                                                                                                                                                       | -             |
|              | 10       | (MH "Epidemiological Research+")<br>(MH "Retrospective Design")<br>(MH "Prospective Studies+")                                                                                                                               | MeSH Headings |
| Study Design | 11       | cohort? OR follow up OR longitudinal OR AB retrospective\$ OR observational                                                                                                                                                  | Abstract      |
|              | 12       | 10 OR 11                                                                                                                                                                                                                     | -             |
|              | 13       | 1 AND 6 AND 9 AND 12<br>Limits: (English Language; Published Date: 2012-2022, Human                                                                                                                                          | All fields    |

+, explode results; \*Truncation (to expand spellings and multiple endings of a word); CINAHL/EBSCO database coverage: 1982 to present. Last searched 15 April 2022.

**Table S4.** Web of Science search strategy.

|              | Search # | Search Statement                                                                                                                                       | Limits   |
|--------------|----------|--------------------------------------------------------------------------------------------------------------------------------------------------------|----------|
| Population   | 1        | Pediatrics OR Child OR Adolescence                                                                                                                     | Topic    |
|              | 2        | maternal obesity OR parent obes* OR maternal overweight OR Pre*pregnancy OR "During Childhood" OR Pre*conception OR obesogenic OR prenatal development | Topic    |
| Exposure     | 3        | body composition OR body weight OR waist circumference OR Body-Weight Trajectory OR body mass index OR BMI OR "Weight for height" OR "BMI for age"     | Topic    |
|              | 4        | 2 AND 3                                                                                                                                                | -        |
| Outcome      | 5        | child obesity OR adolescent obesity                                                                                                                    | Topic    |
| Study Design | 6        | cohort OR longitudinal OR retrospective OR prospective                                                                                                 | Abstract |
|              | 7        | 1 AND 4 AND 5 AND 6<br>Limits: (Publication date: 2012-2022 Languages: English<br>MeSH Headings: Humans)                                               | -        |

\*Truncation (to expand spellings and multiple endings of a word); Web of science database coverage: 1900 to present. Last searched 15 April 2022.

**Table S5.** EMBASE/OVID search strategy.

|               | Search # | Search Statement                                                                                                                                                                                                                                            | Term Type                                      |
|---------------|----------|-------------------------------------------------------------------------------------------------------------------------------------------------------------------------------------------------------------------------------------------------------------|------------------------------------------------|
| Population    | 1        | Pediatrics+ OR child+ OR adolescent+ OR juvenile+                                                                                                                                                                                                           | MeSH Head-ings                                 |
|               | 2        | p?ediatric* OR Child* Adolesc* OR teen* OR juvenile* OR youth*                                                                                                                                                                                              | Keywords                                       |
|               | 3        | 1 OR 2                                                                                                                                                                                                                                                      | -                                              |
| Exposure      | 2        | maternal obesity+ OR mother+ OR prenatal development+ OR parent+ OR Prenatal Exposure Delayed Effects+ OR "Embryonic and Fetal Development"+ OR obesogenic environment+ "Maternal obes*" OR "Maternal weight status" OR "Maternal overweight" OR mother* OR | MeSH Head-ings                                 |
|               | 3        | Postpartum OR Post*natal OR Pre*pregnancy OR Pre*gravid OR "parent* obes*" OR 'During Childhood'                                                                                                                                                            | Keywords                                       |
|               | 4        | 2 OR 3                                                                                                                                                                                                                                                      | -                                              |
|               | 5        | Obesity+ OR overweight+ OR body composition OR body mass+ OR body weight+ OR waist circumference+ OR Body-Weight Trajectory+ OR body mass index+ obes* OR "body composition" OR "body mass index"                                                           | MeSH Head-ings                                 |
|               | 6        | "waist circumference" OR "Body-weight trajectory" OR BMI                                                                                                                                                                                                    | Keywords                                       |
|               | 7        | 5 OR 6                                                                                                                                                                                                                                                      | -                                              |
| Outcome       | 8        | childhood obesity+ OR adolescent obesity+                                                                                                                                                                                                                   | MeSH Head-ings                                 |
|               | 9        | "child* obes*" OR "adolesc* obes*" OR "Weight for height" OR "BMI for age"                                                                                                                                                                                  | Keywords                                       |
|               | 10       | 8 OR 9                                                                                                                                                                                                                                                      | -                                              |
| Study De-sign | 11       | Epidemiology OR cohort analysis OR follow up OR longitudinal study OR retrospective study OR prospective study OR observational study                                                                                                                       | MeSH Head-ings                                 |
|               | 12       | epidemiologic OR cohort? OR follow up OR longitudinal OR retrospective\$ OR prospective\$ OR observational                                                                                                                                                  | Keywords<br><i>Limit to title and abstract</i> |
|               | 13       | 11 OR 12                                                                                                                                                                                                                                                    | -                                              |
|               | 14       | 3 AND 4 AND 7 AND 10 AND 13<br>Limits: (Human and English language and yr="2012 -Current")                                                                                                                                                                  | -                                              |

+, explore results; \*Truncation (to expand spellings and multiple endings of a word); Embase/Ovid database coverage: 1947 to present. Last searched 14 April 2022.
